# Supplementary material for: Mapping the Mechanical Properties of Poly(3-hydroxybutyrate-co-3-hydroxyvalerate) Banded Spherulites by Nanoindentation
Source: MDPI journal article supplement (doi:10.3390/polym8100358), 2016-10-12
Supplement: s1 [file s1]

# Supplementary Materials: Mapping the Mechanical Properties of Poly(3-hydroxybutyrate-co-3-hydroxyvalerate) Banded Spherulites by Nanoindentation

Patricia Enrique-Jimenez, Juan F. Vega, Javier Martínez-Salazar, Fernando Ania and Araceli Flores

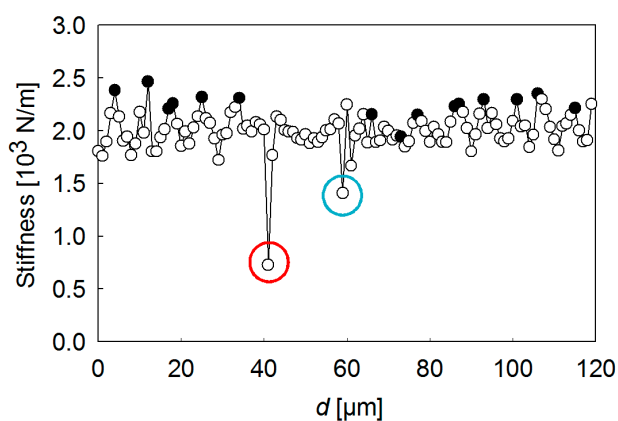

**Figure S1.** Plot of  $S$  (for  $h = 100$  nm) as a function of the distance  $d$  to the starting point of the scanning line of Figure 1. Drawn circles denote the location of cracks.

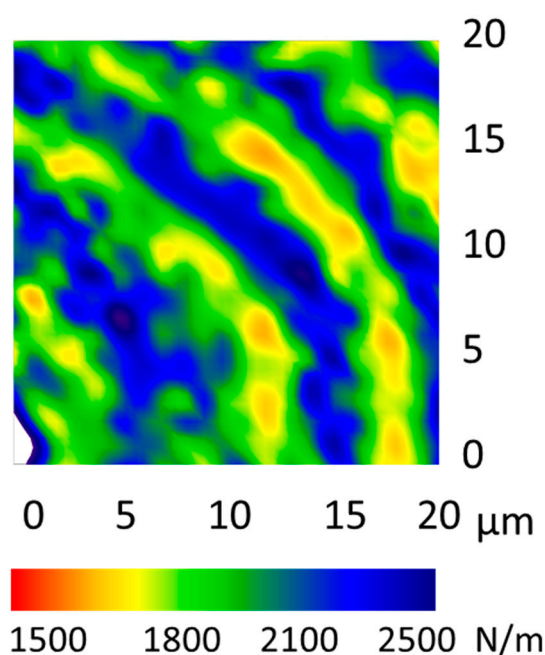

**Figure S2.** Stiffness contour constructed by interpolating the mesh of indentation data taken on the selected area of a P(3HB-co-3HV) spherulite shown in Figure 4a.

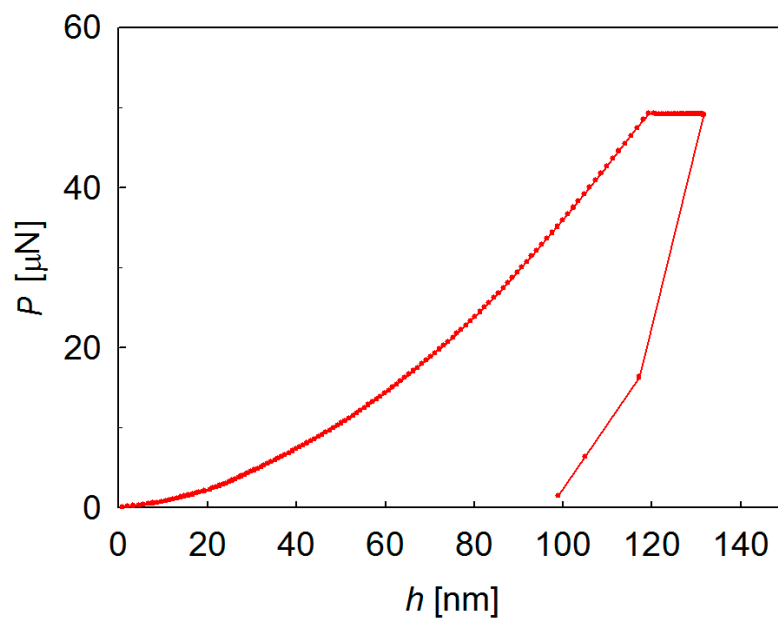

**Figure S3.** Load-depth profile associated to the third indentation on the line of Figure 1, produced on the surface of a (P3HB-co-3HV) spherulite.

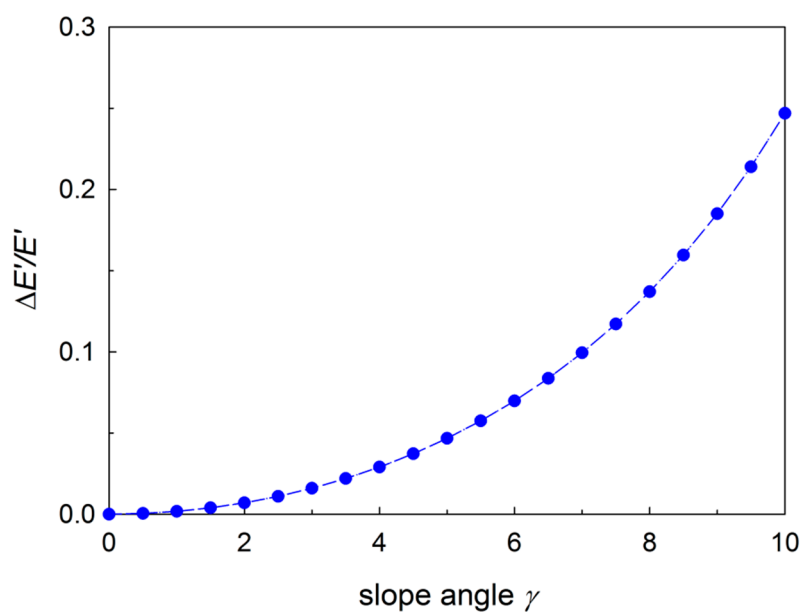

**Figure S4.** Relative variation in indentation storage modulus  $E'$  as a function of the slope angle that forms the oblique surface of the sample with a plane normal to the indentation direction.
